# Supplementary material for: The in situ growth of atomically dispersed Ni species on CeO2 during low-temperature CH4/CO2 reforming
Source: Royal Society of Chemistry journal article supplement (doi:10.1039/d4ta03287j), 2024-01-01
Supplement: d4ta03287j1.pdf [file d4ta03287j1.pdf]

## Supporting Information

### The in-situ growth of atomically dispersed Ni species on CeO<sub>2</sub> during low-temperature CH<sub>4</sub>/CO<sub>2</sub> reforming

Hui Wang<sup>a,\*</sup>, Yansu Hu<sup>a</sup>, Alexander Adogwa,<sup>b</sup> Ming Yang<sup>b,\*</sup>, Tong-Bu Lu<sup>a,\*</sup>

<sup>a</sup> Institute for New Energy Materials and Low Carbon Technologies, School of Materials Science and Engineering, Tianjin University of Technology, Tianjin 300384, China

<sup>b</sup> Department of Chemical and Biomolecular Engineering, Clemson University, Clemson, SC, 29634, USA

#### Corresponding Author

[\\*wanghui2020@email.tjut.edu.cn](mailto:wanghui2020@email.tjut.edu.cn); [\\*myang3@clemson.edu](mailto:myang3@clemson.edu); [\\*lutongbu@tjut.edu.cn](mailto:lutongbu@tjut.edu.cn)

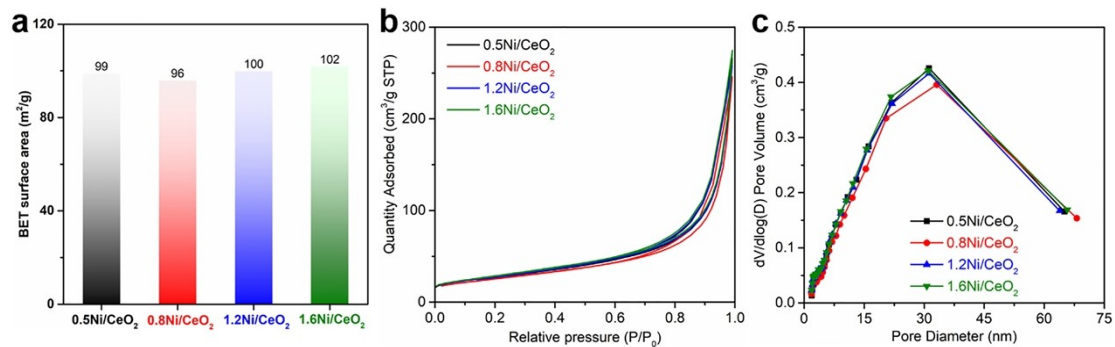

**Fig. S1.** The physical structures of Ni/CeO<sub>2</sub> catalysts with different Ni species. (a) BET surface area, (b) N<sub>2</sub> adsorption-desorption curves, and (c) the pore distribution curves of the four Ni/CeO<sub>2</sub> catalysts.

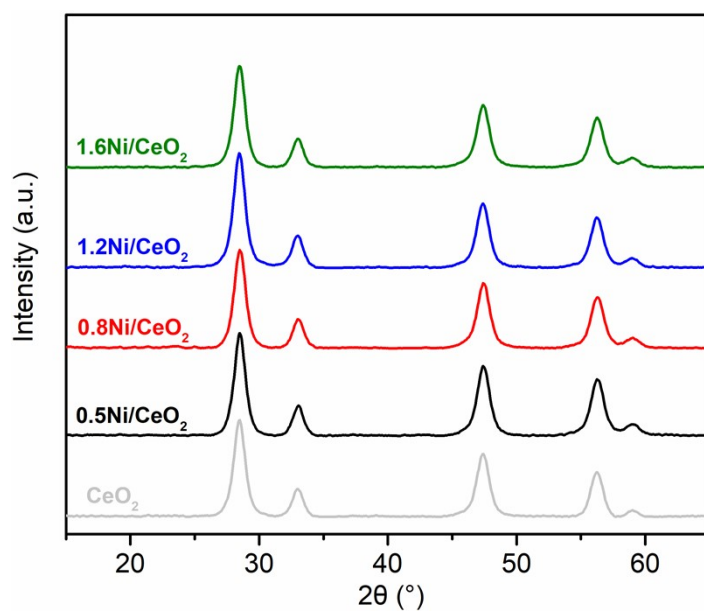

**Fig. S2.** XRD patterns of the as-prepared Ni-free ceria and Ni/CeO<sub>2</sub> catalysts. No Ni or NiO signal was detected.

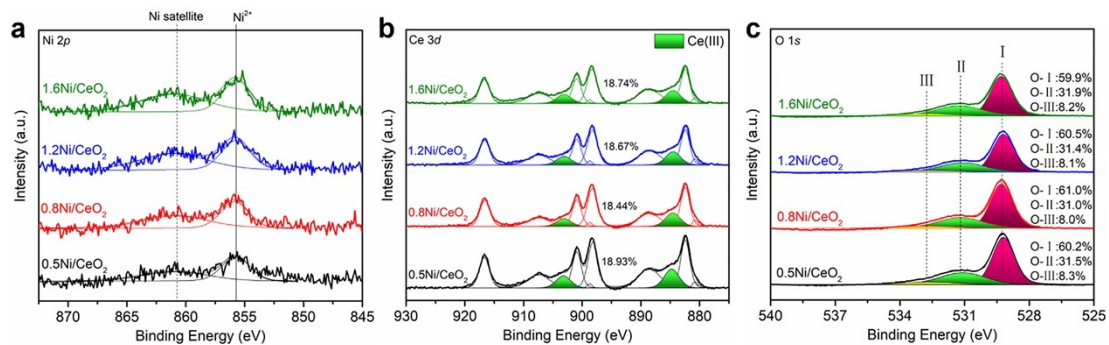

**Fig. S3.** XPS spectra of as-prepared Ni/CeO<sub>2</sub> samples. (a) Ni 2*p*, (b) Ce 3*d*, and (c) O 1*s* spectra of Ni/CeO<sub>2</sub> samples with different Ni loading amount.

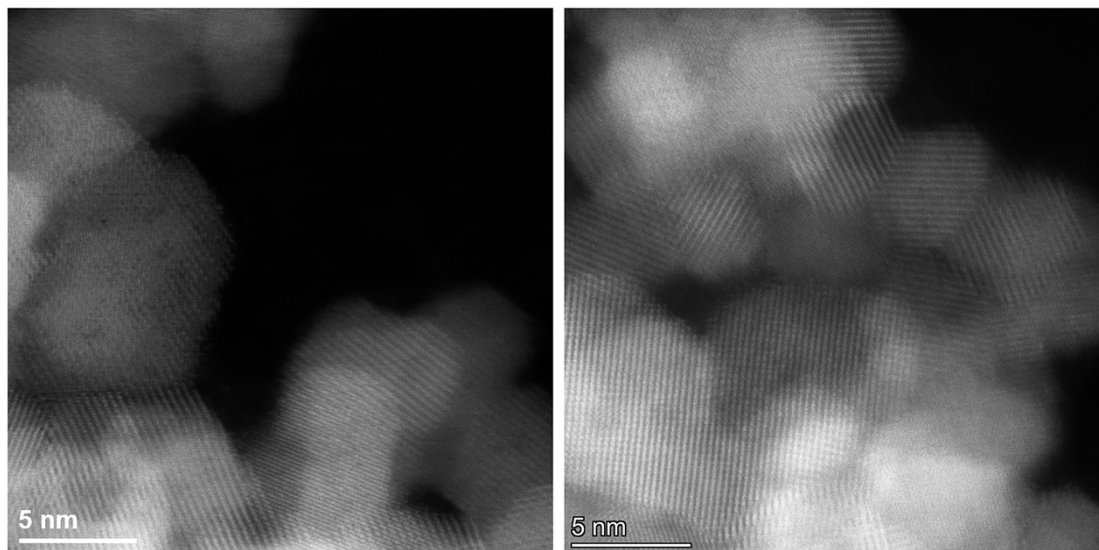

**Fig. S4.** Aberration-corrected HAADF-STEM images for the as-prepared 1.6Ni/CeO<sub>2</sub> catalyst. No obvious Ni NPs was observed. The left and right images are the two representative views.

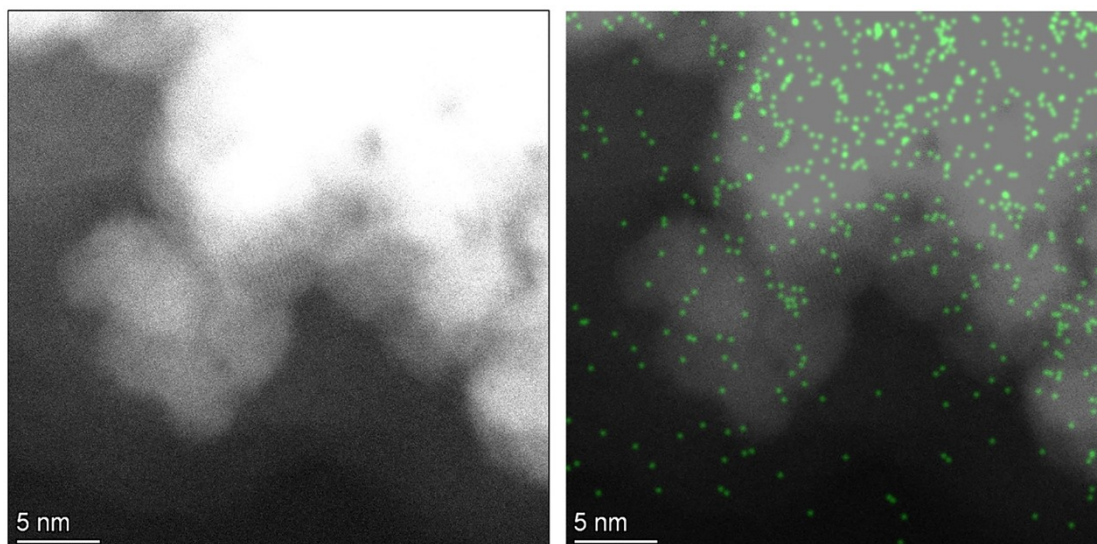

**Fig. S5.** Aberration-corrected HAADF-STEM image (left) and the corresponding EDS mapping (right) for the as-prepared 1.6Ni/CeO<sub>2</sub> catalyst. No obvious Ni NPs was observed. The green dot represents the Ni element.

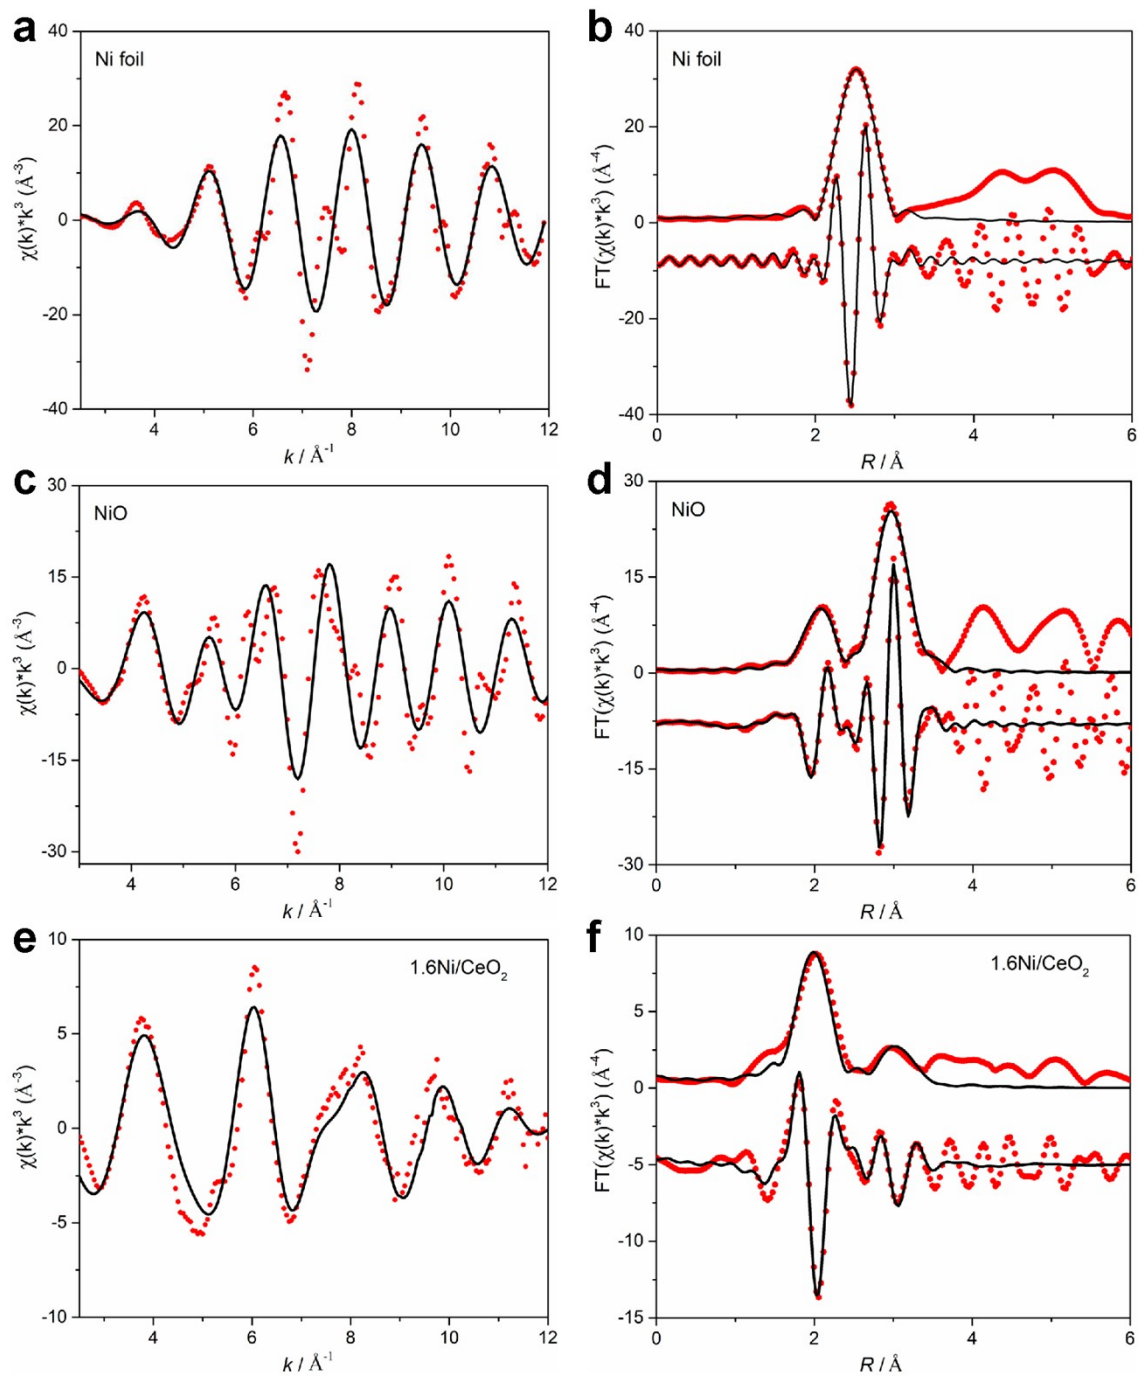

**Fig. S6.** Ni K-edge EXAFS (points) and curvefit (line) in  $k^3$  weighted  $k$ -space (a, c, e) and  $R$ -space (FT magnitude and imaginary component, b, d, f). The data were phase-corrected.

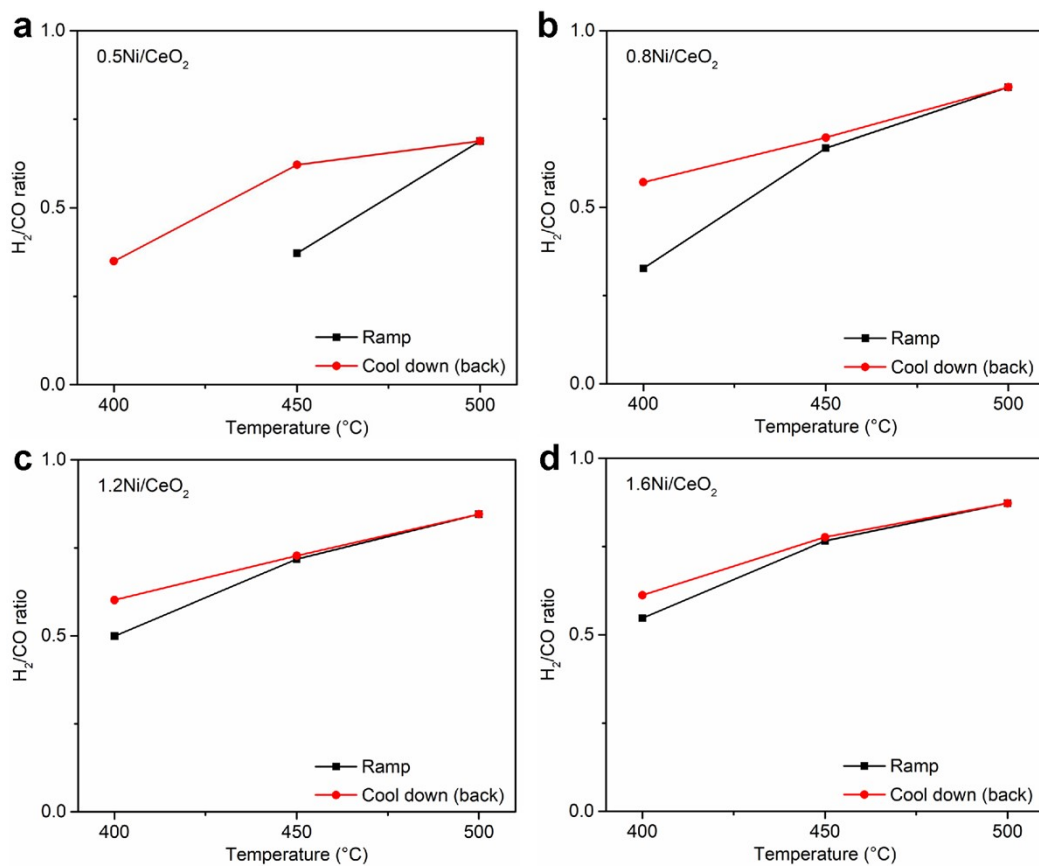

**Fig. S7.** The H<sub>2</sub>/CO ratios of different Ni/CeO<sub>2</sub> catalysts during DRM reaction. The H<sub>2</sub>/CO ratios during the ramping and cooling down (back) process of (a) 0.5Ni/CeO<sub>2</sub>, (b) 0.8Ni/CeO<sub>2</sub>, (c) 1.2Ni/CeO<sub>2</sub>, and (d) 1.6Ni/CeO<sub>2</sub>. These H<sub>2</sub>/CO ratios correspond to the DRM catalytic performance in Fig. 5. Reaction conditions: [CH<sub>4</sub>] = [CO<sub>2</sub>] = 1%, balanced with N<sub>2</sub>, contact time: 100,000 mL g<sub>cat</sub><sup>-1</sup> h<sup>-1</sup>.



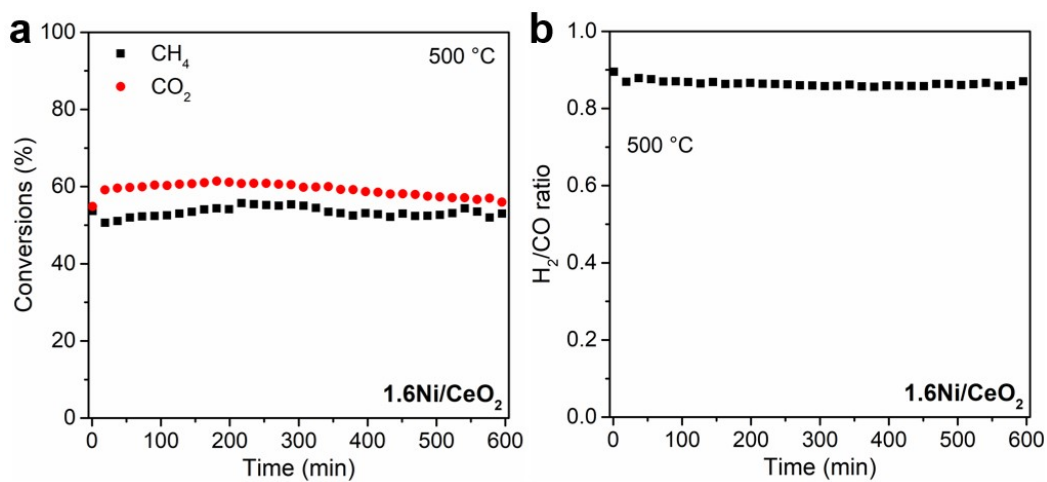

**Fig. S8.** DRM stability test at 500 °C for 1.6Ni/CeO<sub>2</sub> catalyst (a) Conversions of CH<sub>4</sub> and CO<sub>2</sub> (b) H<sub>2</sub>/CO ratio (Reaction conditions: [CH<sub>4</sub>] = [CO<sub>2</sub>] = 1%, balanced with N<sub>2</sub>, contact time: 25,000 mL gcat<sup>-1</sup> h<sup>-1</sup>.)

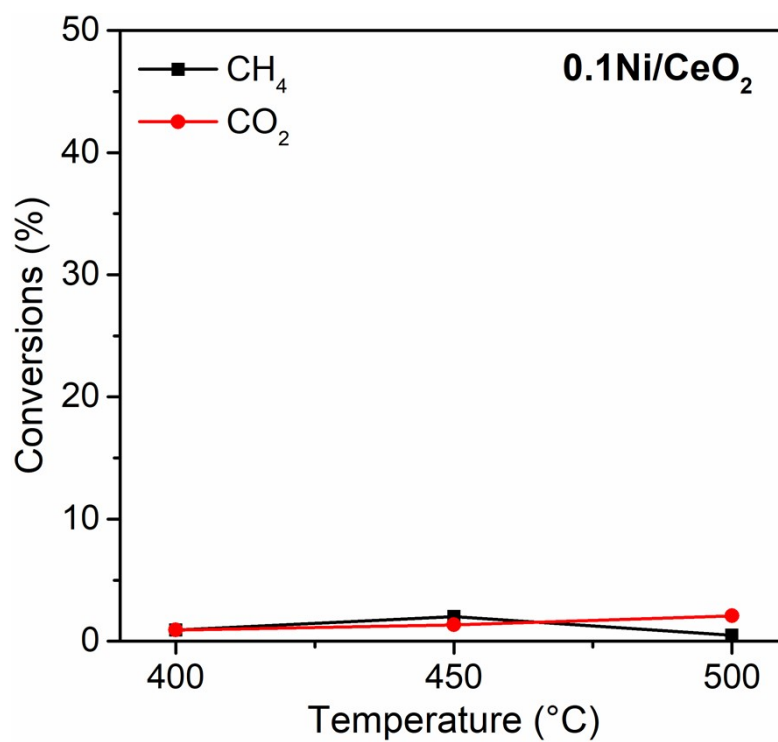

**Fig. S9.** DRM reaction test for 0.1Ni/CeO<sub>2</sub> sample (Reaction conditions: [CH<sub>4</sub>] = [CO<sub>2</sub>] = 1%, balanced with N<sub>2</sub>, contact time: 25,000 mL gcat<sup>-1</sup> h<sup>-1</sup>.)

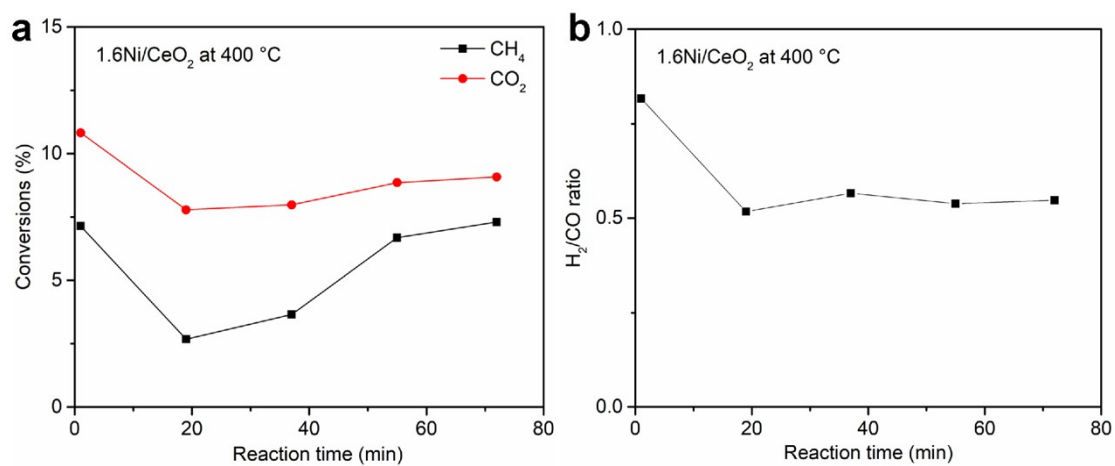

**Fig. S10.** DRM reactivity evolution of 1.6Ni/CeO<sub>2</sub> catalyst at 400 °C. (a) CH<sub>4</sub> & CO<sub>2</sub> conversions (b) H<sub>2</sub>/CO ratio. Reaction conditions: [CH<sub>4</sub>] = [CO<sub>2</sub>] = 1%, balanced with N<sub>2</sub>, contact time: 100,000 mL g<sub>cat</sub><sup>-1</sup> h<sup>-1</sup>.

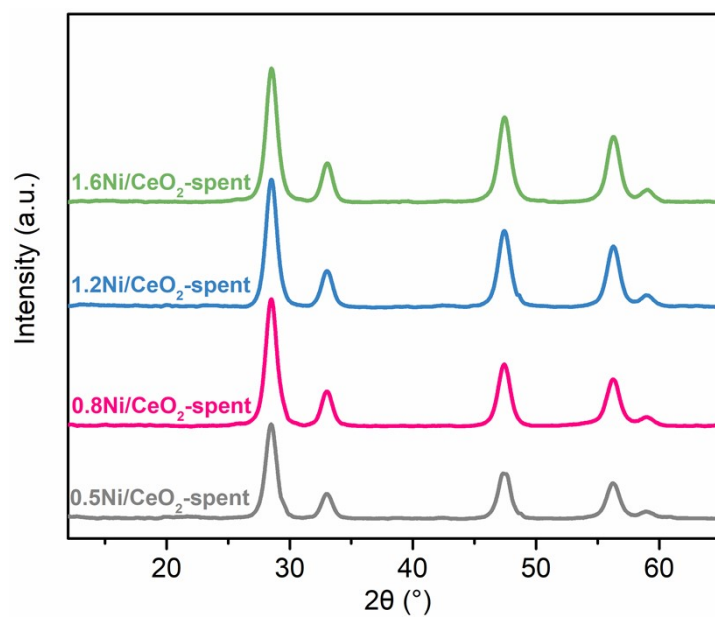

**Fig. S11.** XRD patterns of the reaction-spent Ni/CeO<sub>2</sub> catalysts. No Ni or NiO signal was detected.

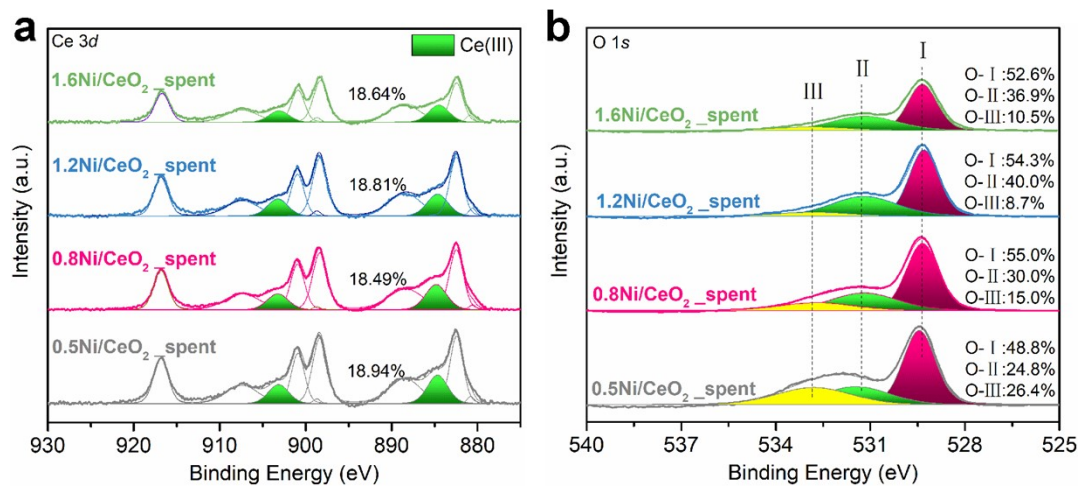

**Fig. S12.** XPS spectra of reaction-spent Ni/CeO<sub>2</sub> samples. (a) Ce 3d, and (b) O 1s spectra of Ni/CeO<sub>2</sub> samples with different Ni loading amount.

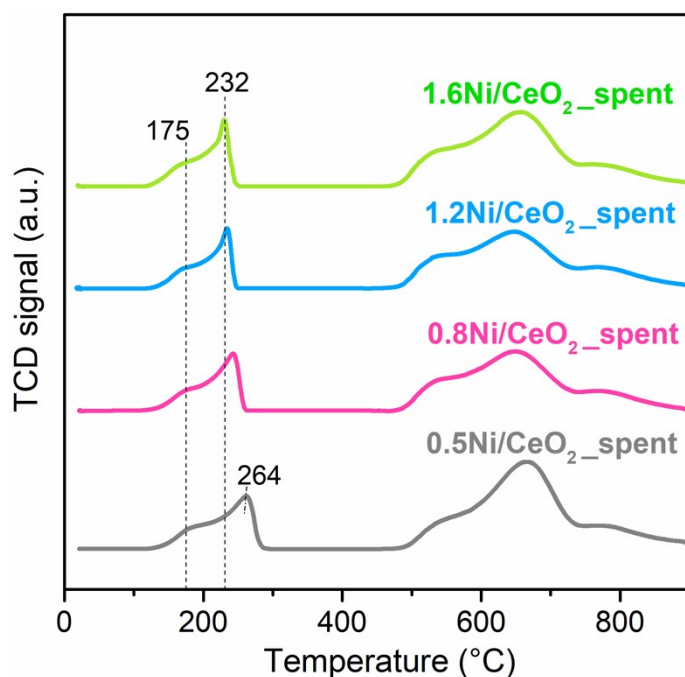

**Fig. S13** H<sub>2</sub> TPR curves of the reaction-spent Ni/CeO<sub>2</sub> samples with different Ni loading amount.

The H<sub>2</sub> TPR curves below 300 °C are quite similar in shape, with all initial reduction peaks centered at 175 °C. This differs from the as-prepared counterparts, which exhibit significant discrepancy ranging from single atoms to nanoparticles (NPs) or clusters as Ni loading increases (Fig. 4). Additionally, the spent 0.5Ni/CeO<sub>2</sub> shows a higher reduction temperature at the latter peak (264 °C), compared to 232 °C for the spent 1.2Ni/CeO<sub>2</sub> and 1.6Ni/CeO<sub>2</sub>. Compared to the as-prepared samples (Fig. 4), all the reduction peaks have shifted to higher temperatures, likely due to carbon deposits. Based on the H<sub>2</sub> reduction attribution for the as-prepared Ni/CeO<sub>2</sub> catalysts (Fig. 4), where Ni NPs or clusters are preferentially reduced over single atoms, we conclude that there are still some Ni single atoms in the spent 0.5Ni/CeO<sub>2</sub> sample. The spent 0.8Ni/CeO<sub>2</sub> contains fewer Ni single atoms, while NPs or clusters predominate in the spent 1.2Ni/CeO<sub>2</sub> and 1.6Ni/CeO<sub>2</sub> catalysts.

**Table S1** Fitting parameters of the curves fitted  $k^3$ -weighted EXAFS analyses at Ni K-edge.

| Sample                 | Shell   | CN             | R (Å)           | $\Delta E_0$ (eV) | $\sigma^2$ (Å <sup>2</sup> ) | R-factor |
|------------------------|---------|----------------|-----------------|-------------------|------------------------------|----------|
| Ni foil                | Ni-Ni   | 12.0           | $2.48 \pm 0.01$ | $6.3 \pm 1.1$     | 0.002                        | 0.01     |
| NiO                    | Ni-O    | $5.7 \pm 0.7$  | $2.07 \pm 0.03$ | $9.3 \pm 0.8$     | 0.003                        | 0.01     |
|                        | Ni-O-Ni | $13.2 \pm 1.5$ | $2.96 \pm 0.02$ |                   | 0.005                        |          |
| 1.6Ni/CeO <sub>2</sub> | Ni-O    | $6.7 \pm 1.2$  | $2.02 \pm 0.08$ | $6.5 \pm 2.4$     | 0.005                        | 0.02     |
|                        | Ni-Ce   | 4.0            | $3.03 \pm 0.09$ |                   | 0.006                        |          |
|                        |         | 2.0            | $3.13 \pm 0.02$ |                   | 0.006                        |          |

Note: Direct Ni-Ni contact does not exist in the 1.6Ni/CeO<sub>2</sub> sample. Amplitude reduction factor:  $S_0^2$ : 0.79 (obtained by analyzing the known Ni foil sample); CN, coordination number; R, the distance between absorber and backscattered atoms;  $\Delta E_0$ , inner potential correction;  $\sigma^2$ , Debye-Waller factor, an evaluation for thermal and structural disorders; R-factor, closeness of the fit, if  $\leq 0.02$ , consistent with broadly correct models.

---

**Table S2** Ni dispersions of different Ni/CeO<sub>2</sub> catalysts after DRM reaction.

| Catalysts                     | Ni dispersion (%) |
|-------------------------------|-------------------|
| 0.5Ni/CeO <sub>2</sub> -spent | 51                |
| 0.8Ni/CeO <sub>2</sub> -spent | 50                |
| 1.2Ni/CeO <sub>2</sub> -spent | 47                |
| 1.6Ni/CeO <sub>2</sub> -spent | 48                |

Note: Ni dispersion was measured by CO chemisorption, and there is a CO<sub>2</sub> passivation for Ce<sup>3+</sup> before CO pulse in. The ratio for CO: Ni was assumed to be 1:1. These reaction-spent Ni/CeO<sub>2</sub> catalysts suffered from the reaction from 400 to 500 °C with an interval of 50 °C and stayed for about an hour at each temperature point.



**Table S3** TOF comparisons of various Ni-based catalysts reported in the literature and our work.

| Samples                                     | Ni loading<br>(wt. %) | TOF<br>(s <sup>-1</sup> ) | Temperature<br>(°C) | Note     |
|---------------------------------------------|-----------------------|---------------------------|---------------------|----------|
| 0.5Ni/CeO <sub>2</sub>                      | 0.5                   | 0.046                     | 500                 | Our work |
| 1.6Ni/CeO <sub>2</sub>                      | 1.6                   | 0.049                     | 500                 |          |
| NiCe/SiO <sub>2</sub> -A                    | 5.67                  | 0.064                     | 500                 | 1        |
| Ni/SiO <sub>2</sub> -A                      | 6.75                  | 0.045                     | 500                 |          |
| Ni/SiO <sub>2</sub> -I                      | 6.79                  | 0.010                     | 500                 |          |
| Ni/CeO <sub>2</sub>                         | 5                     | 0.018                     | 500                 | 2        |
| 3%-Ni/(NA-Al <sub>2</sub> O <sub>3</sub> )  | 3                     | 0.054                     | 500                 | 3        |
| 5%-Ni/(NA-Al <sub>2</sub> O <sub>3</sub> )  | 5                     | 0.049                     | 500                 |          |
| 10%-Ni/(NA-Al <sub>2</sub> O <sub>3</sub> ) | 10                    | 0.034                     | 500                 |          |
| 20%-Ni/(NA-Al <sub>2</sub> O <sub>3</sub> ) | 20                    | 0.017                     | 500                 |          |
| Ni/Mg(Al)O                                  | 12                    | 0.045                     | 500                 | 4        |
| Ni-Cu/Mg(Al)O(Cu/Ni=0.25)                   | 12                    | 0.050                     | 500                 |          |
| 0.5Ni/CeO <sub>2</sub>                      | 0.5                   | 0.031                     | 450                 | Our work |
| 1.6Ni/CeO <sub>2</sub>                      | 1.6                   | 0.027                     | 450                 |          |
| Ni-Zr/SiO <sub>2</sub>                      | 8.3                   | 0.004                     | 450                 | 5        |
| Ni-Si/ZrO <sub>2</sub>                      | 7.8                   | 0.008                     | 450                 |          |
| 0.5Ni/CeO <sub>2</sub>                      | 0.5                   | 0.006                     | 400                 | Our work |
| 1.6Ni/CeO <sub>2</sub>                      | 1.6                   | 0.013                     | 400                 |          |
| Ni-Zr/SiO <sub>2</sub>                      | 8.3                   | 0.001                     | 400                 | 5        |
| Ni-Si/ZrO <sub>2</sub>                      | 7.8                   | 0.003                     | 400                 |          |
| Ni@SiO <sub>2</sub> @CeO <sub>2</sub>       |                       | 0.015                     | 400                 | 6        |
| Ni@SiO <sub>2</sub>                         |                       | 0.009                     | 400                 |          |

Note: TOF values were calculated from the methane conversion and based on the total loading amount of Ni atoms. Here, we didn't involve Ni dispersion to avoid any experimental error from CO or H<sub>2</sub> chemisorption.

---

## References

- 1 X. Zhao, M. Lu, H. Li, J. Fang, L. Shi and D. Zhang, *New J. Chem.*, 2017, **41**, 4869–4878.
- 2 M. Li and A. C. van Veen, *Appl. Catal. B Environ.*, 2018, **237**, 641–648.
- 3 S. Zhang, T. Yang, J. Yu, W. Zhan, L. Wang, Y. Guo and Y. Guo, *New J. Chem.*, 2021, **45**, 21750–21762.
- 4 K. Song, M. Lu, S. Xu, C. Chen, Y. Zhan, D. Li, C. Au, L. Jiang and K. Tomishige, *Appl. Catal. B Environ.*, 2018, **239**, 324–333.
- 5 Y. Wang, L. Yao, Y. Wang, S. Wang, Q. Zhao, D. Mao and C. Hu, *ACS Catal.*, 2018, **8**, 6495–6506.
- 6 K. Han, W. Yu, L. Xu, Z. Deng, H. Yu and F. Wang, *Fuel*, 2021, **291**, 120182.
